# Supplementary material
Source: publisher figshare collection journal article supplement (https://tandf.figshare.com/ndownloader/files/14501717)
Supplement: Supplementary file 1 [file 14501717]

**Supplemental Figure 1: Uveitis Survey**

Supplemental Figure 1: Uveitis Survey

The online survey was designed and distributed through the secure electronic data collection tool REDCap. The survey consisted of 18 primary questions, with additional secondary questions requesting additional information displayed if specific responses were inputted. Deidentified patient data was collected, including questions regarding patient demographic information, uveitis clinical summary, uveitis treatment, and checkpoint inhibitor drug information. All responses were saved in HIPAA compliant data backup.
